# Supplementary material for: Dissolved organic matter modified magnetic carbon nanotubes enhance the bioremediation of azo dyes and Cr(vi)
Source: Royal Society of Chemistry journal article supplement (doi:10.1039/c9ew00965e), 2020-01-01
Supplement: c9ew00965e1.pdf [file c9ew00965e1.pdf]

## Supplementary information

### Dissolved organic matter modified magnetic carbon nanotubes enhance the bioremediation of azo dyes and Cr(VI)

Caiwen He<sup>a</sup>, Lipeng Gu<sup>b</sup>, Huan He<sup>\*,a,c</sup>, Zhe Zhang<sup>c</sup>, Xiaoxia Wang<sup>a</sup>, Fengxia Han<sup>\*\*,a</sup> Bin  
Huang<sup>a,d</sup>, and Xuejun Pan<sup>a,d</sup>

Fig. S1. Nitrogen adsorption-desorption isotherms curves of AQS/Fe<sub>3</sub>O<sub>4</sub>/CNTs and HA/Fe<sub>3</sub>O<sub>4</sub>/CNTs

Fig. S2. Fluorescence spectra of AQS/Fe<sub>3</sub>O<sub>4</sub>/CNTs and HA/Fe<sub>3</sub>O<sub>4</sub>/CNTs

AQS contained model humic acid polymers, however, HA contained fulvic acid, humic acid and humic acid-like components, therefore, AQS was pure whereas HA contained complicated impurities.

Fig. S3. The cyclic voltammetry (CV) curves of Cr(VI) and methyl orange.

It was found that the reduction of Cr(VI) took precedence over methyl orange decolorization driven by anaerobic bacteria. Because as terminal electron acceptors, Cr(VI) which had relatively active redox activity received electrons in preference to methyl orange according to the cyclic voltammetry (CV) curves.

Fig. S4. The Shannon-weaver index of anaerobic bacteria (AB: bacteria in system with the addition of AQS/Fe<sub>3</sub>O<sub>4</sub>/CNTs, HB: bacteria in system with the addition of HA/Fe<sub>3</sub>O<sub>4</sub>/CNTs).

Bacterial community of HB was more diverse than AB, implying that the kind of DOM would affect the biodiversity of the anaerobic bacteria.

Table S1. The significance level of different materials.

Table S2. Effect of Fe<sub>3</sub>O<sub>4</sub> on significance level of different groups.

Table S3. Effect of initial Cr(VI) concentration on significance level of different groups.

Table S4. The significance level of single system and binary system.

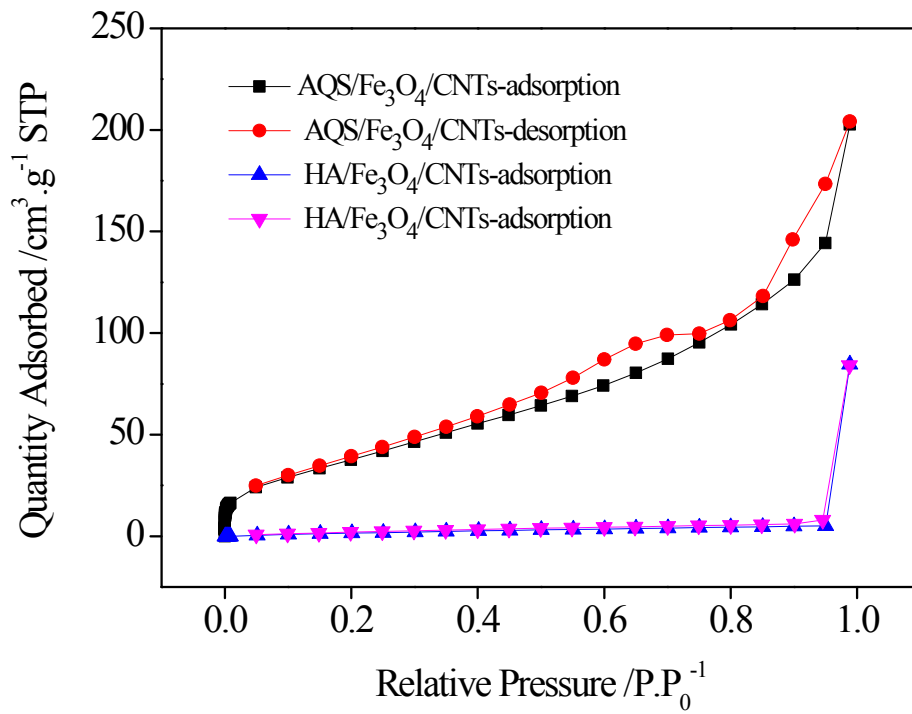

Fig. S1. Nitrogen adsorption-desorption isotherms curves of AQS/Fe<sub>3</sub>O<sub>4</sub>/CNTs and HA/Fe<sub>3</sub>O<sub>4</sub>/CNTs.

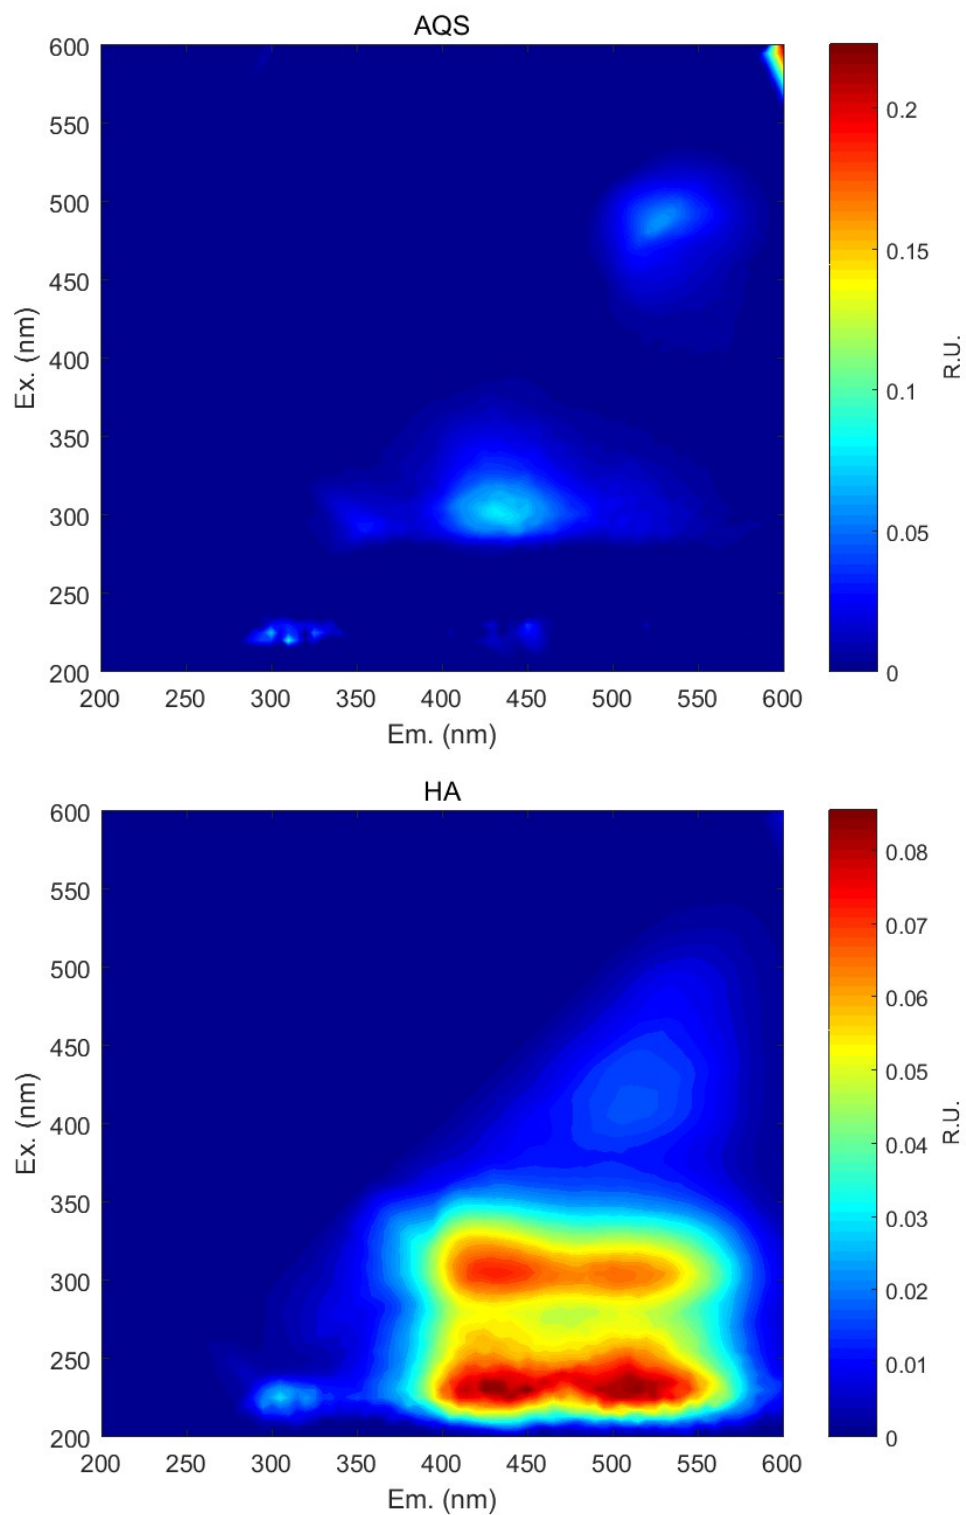

Fig. S2. Fluorescence spectra of AQS/Fe<sub>3</sub>O<sub>4</sub>/CNTs and HA/Fe<sub>3</sub>O<sub>4</sub>/CNTs.

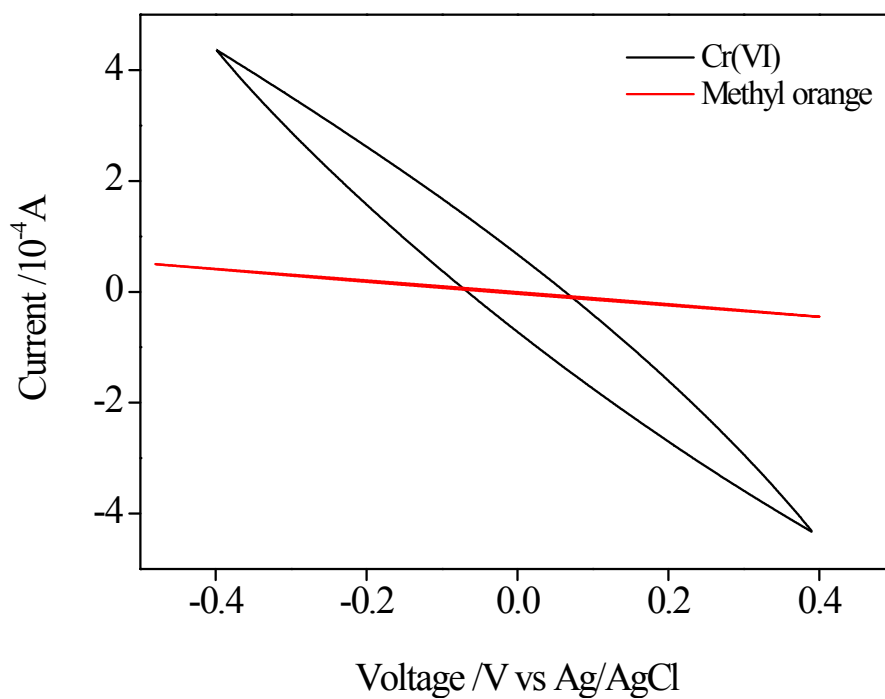

Fig. S3. The cyclic voltammetry (CV) curves of Cr(VI) and methyl orange.

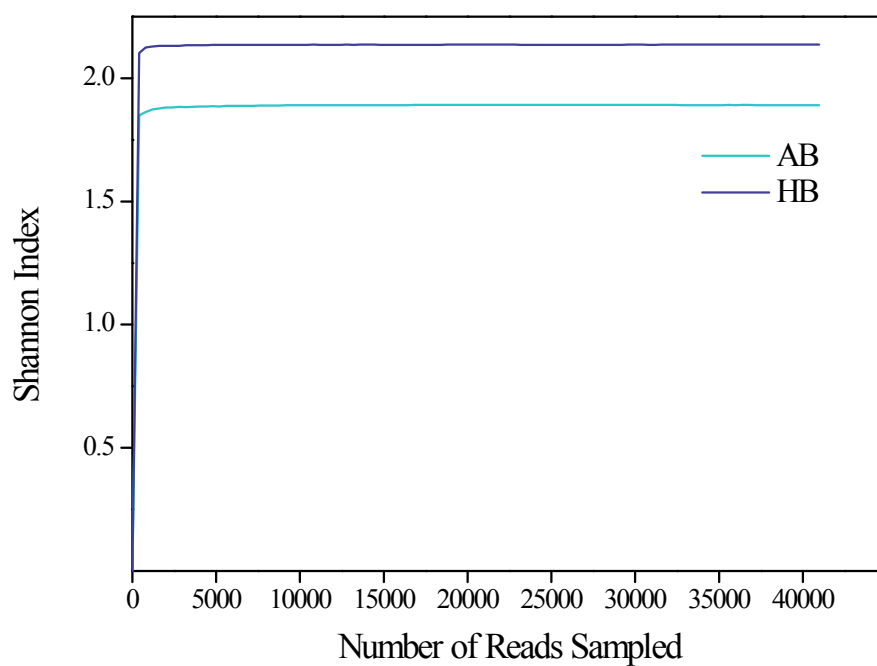

Fig. S4. The Shannon-weaver index of anaerobic bacteria (AB: bacteria in system with the addition of AQS/Fe<sub>3</sub>O<sub>4</sub>/CNTs, HB: bacteria in system with the addition of HA/Fe<sub>3</sub>O<sub>4</sub>/CNTs).

Table S1. The significance level of different materials.

| (I) Material                                 | (J) Material                                | t (h) | <i>p</i> Cr(VI) | <i>p</i> MO |
|----------------------------------------------|---------------------------------------------|-------|-----------------|-------------|
|                                              |                                             | 6     | 0.001           | 0.116       |
|                                              |                                             | 12    | 0.023           | 0.774       |
| AQS/Fe <sub>3</sub> O <sub>4</sub> /CNTs-0.5 | HA/Fe <sub>3</sub> O <sub>4</sub> /CNTs-0.8 | 24    | 0.007           | 0.339       |
|                                              |                                             | 30    | 0.056           | 0.220       |
|                                              |                                             | 36    | 0.002           | 0           |

MO, methyl orange.  $p \leq 0.05$  represent significant differences.

Table S2. Effect of Fe<sub>3</sub>O<sub>4</sub> on significance level of different groups.

| (I) Materials                               | (J) Materials                               | <i>p</i> (6 h) |       | <i>p</i> (12 h) |       | <i>p</i> (24 h) |       | <i>p</i> (30 h) |       | <i>p</i> (36 h) |       |
|---------------------------------------------|---------------------------------------------|----------------|-------|-----------------|-------|-----------------|-------|-----------------|-------|-----------------|-------|
|                                             |                                             | Cr(VI)         | MO    | Cr(VI)          | MO    | Cr(VI)          | MO    | Cr(VI)          | MO    | Cr(VI)          | MO    |
|                                             | AQS/CNTs-0.5                                | 0.379          | 0.457 | 0.545           | 0.455 | 0.095           | 0.099 | 0.157           | 0.009 | 0.026           | 0.009 |
| AQS/Fe <sub>3</sub> O <sub>4</sub> /CNTs-   | HA/Fe <sub>3</sub> O <sub>4</sub> /CNTs-0.8 | 0              | 0.617 | 0.001           | 0.924 | 0.007           | 0.282 | 0.028           | 0.092 | 0.079           | 0.039 |
| 0.5                                         | HA/CNTs-0.8                                 | 0              | 0.326 | 0               | 0.042 | 0.001           | 0.014 | 0               | 0     | 0               | 0     |
|                                             | Fe <sub>3</sub> O <sub>4</sub> /CNTs        | 0              | 0.335 | 0               | 0.029 | 0               | 0.003 | 0               | 0     | 0               | 0     |
|                                             | HA/Fe <sub>3</sub> O <sub>4</sub> /CNTs-0.8 | 0              | 0.226 | 0               | 0.511 | 0.153           | 0.511 | 0.323           | 0.204 | 0.522           | 0.404 |
| AQS/CNTs-0.5                                | HA/CNTs-0.8                                 | 0              | 0.101 | 0               | 0.151 | 0.010           | 0.282 | 0.001           | 0.003 | 0.028           | 0     |
|                                             | Fe <sub>3</sub> O <sub>4</sub> /CNTs        | 0              | 0.104 | 0               | 0.108 | 0.001           | 0.062 | 0               | 0     | 0               | 0     |
| HA/Fe <sub>3</sub> O <sub>4</sub> /CNTs-0.8 | HA/CNTs-0.8                                 | 0.185          | 0.617 | 0.011           | 0.049 | 0.138           | 0.099 | 0.003           | 0     | 0.009           | 0     |
|                                             | Fe <sub>3</sub> O <sub>4</sub> /CNTs        | 0.028          | 0.630 | 0.001           | 0.034 | 0.010           | 0.019 | 0               | 0     | 0               | 0     |
| HA/CNTs-0.8                                 | Fe <sub>3</sub> O <sub>4</sub> /CNTs        | 0.282          | 0.985 | 0.153           | 0.837 | 0.151           | 0.359 | 0.024           | 0.154 | 0.003           | 0.015 |

MO, methyl orange.  $p \leq 0.05$  represent significant differences.

Table S3. Effect of initial Cr(VI) concentration on significance level of different groups.

| (I)<br>Initial Cr(VI)<br>concentration<br>(mg L <sup>-1</sup> ) | (J)<br>Initial Cr(VI)<br>concentration<br>(mg L <sup>-1</sup> ) | <i>p</i> (6 h) |       | <i>p</i> (12 h) |       | <i>p</i> (24 h) |       | <i>p</i> (30 h) |       | <i>p</i> (36 h) |       |
|-----------------------------------------------------------------|-----------------------------------------------------------------|----------------|-------|-----------------|-------|-----------------|-------|-----------------|-------|-----------------|-------|
|                                                                 |                                                                 | Cr(VI)         | MO    | Cr(VI)          | MO    | Cr(VI)          | MO    | Cr(VI)          | MO    | Cr(VI)          | MO    |
| 10                                                              | 15                                                              | 0              | 0.231 | 0               | 0.112 | 0.002           | 0.002 | 0               | 0.001 | 0               | 0     |
| (AQS/Fe <sub>3</sub> O <sub>4</sub> /CNTs                       | 20                                                              | 0              | 0.359 | 0               | 0.130 | 0               | 0     | 0               | 0     | 0               | 0     |
| )                                                               | 25                                                              | 0              | 0.087 | 0               | 0.073 | 0               | 0     | 0               | 0     | 0               | 0     |
| 15                                                              | 20                                                              | 0.663          | 0.754 | 0.312           | 0.928 | 0.035           | 0.002 | 0               | 0.023 | 0               | 0     |
| (AQS/Fe <sub>3</sub> O <sub>4</sub> /CNTs                       | 25                                                              | 0.125          | 0.535 | 0.100           | 0.785 | 0.008           | 0.001 | 0               | 0.009 | 0               | 0     |
| )                                                               |                                                                 |                |       |                 |       |                 |       |                 |       |                 |       |
| 20                                                              | 25                                                              | 0.242          | 0.359 | 0.458           | 0.717 | 0.381           | 0.561 | 0.085           | 0.564 | 0.101           | 0.232 |
| (AQS/Fe <sub>3</sub> O <sub>4</sub> /CNTs                       |                                                                 |                |       |                 |       |                 |       |                 |       |                 |       |
| )                                                               |                                                                 |                |       |                 |       |                 |       |                 |       |                 |       |
| 10                                                              | 15                                                              | 0.033          | 0.273 | 0.008           | 0.001 | 0.002           | 0.009 | 0               | 0     | 0               | 0     |
| (HA/Fe <sub>3</sub> O <sub>4</sub> /CNTs)                       | 20                                                              | 0.027          | 0.455 | 0.003           | 0     | 0               | 0.002 | 0               | 0     | 0               | 0     |
|                                                                 | 25                                                              | 0.015          | 0.086 | 0.001           | 0     | 0               | 0.002 | 0               | 0     | 0               | 0     |
| 15                                                              | 20                                                              | 0.901          | 0.705 | 0.491           | 0.218 | 0.028           | 0.349 | 0.006           | 0.016 | 0               | 0.007 |
| (HA/Fe <sub>3</sub> O <sub>4</sub> /CNTs)                       | 25                                                              | 0.621          | 0.455 | 0.182           | 0.147 | 0.013           | 0.279 | 0.002           | 0.007 | 0               | 0.003 |
| 20                                                              | 250                                                             | 0.710          | 0.273 | 0.480           | 0.796 | 0.625           | 0.872 | 0.358           | 0.625 | 0.317           | 0.654 |
| (HA/Fe <sub>3</sub> O <sub>4</sub> /CNTs)                       |                                                                 |                |       |                 |       |                 |       |                 |       |                 |       |

MO, methyl orange.  $p \leq 0.05$  represent significant differences.





Table S4. The significance level of single system and binary system.

| (I)<br>Systems | (J)<br>Systems | <i>p</i> (AQS/Fe <sub>3</sub> O <sub>4</sub> /CNTs) |       |       |       |       | <i>p</i> (HA/Fe <sub>3</sub> O <sub>4</sub> /CNTs) |       |       |      |       |
|----------------|----------------|-----------------------------------------------------|-------|-------|-------|-------|----------------------------------------------------|-------|-------|------|-------|
|                |                | 6 h                                                 | 12 h  | 24 h  | 30 h  | 36 h  | 6 h                                                | 12 h  | 24 h  | 30 h | 36 h  |
| Cr(VI)-S       | Cr(VI)-B       | 0.063                                               | 0.394 | 0.006 | 0.011 | 1.000 | 0.042                                              | 0.400 | 0.046 | 0    | 0.002 |
| MO-S           | MO-B           | 0.002                                               | 0.012 | 0.002 | 0.008 | 0.286 | 0.003                                              | 0.044 | 0.003 | 0    | 0.002 |

S, single pollutant system with Cr(VI) or methyl orange alone; B, binary pollutants system with Cr(VI) or methyl orange in combination. MO, methyl orange.  $p \leq 0.05$  represent significant differences.
